# Supplementary material for: Cas12a-assisted precise targeted cloning using in vivo Cre-lox recombination
Source: PubMed Central journal article supplement (PMC7896053; doi:10.1038/s41467-021-21275-4), 2021-02-19
Supplement: 41467_2021_21275_MOESM5_ESM.pdf [file 41467_2021_21275_MOESM5_ESM.pdf]

**Title:** Supplementary Data 1.

**Description:** Oligonucleotides used in this study
